# Supplementary material for: The Rb1 tumour suppressor gene modifies telomeric chromatin architecture by regulating TERRA expression
Source: Sci Rep. 2017 Feb 7;7:42056. doi: 10.1038/srep42056 (PMC5294645; doi:10.1038/srep42056)
Supplement: Supplementary Material [file srep42056-s1.pdf]

## **The *Rb1* tumour suppressor gene modifies telomeric chromatin architecture by regulating TERRA expression.**

I. Gonzalez-Vasconcellos<sup>a</sup>, R. Schneider<sup>b</sup>, Natasa Anastasov<sup>c</sup>, S. Alonso-Rodriguez<sup>a</sup>, B. Sanli-Bonazzi<sup>c</sup>, JL Fernández<sup>a,d</sup>, MJ Atkinson<sup>c\*</sup>

Supplementary 1: **A.** GFP signal in the U2OS cells transfected with the Rb1 knock down vector (shRB1) or the overexpressing vector (Ef1-RB1), 72h post transfection. **B.** Western blot and its quantification performed with the Rb1 antibody form BD to assess the amount of Rb1 protein after transient transfections.

Supplementary 2: Q-PCR quantification showed the endogenous TERRA expression in human U2OS cells modulated by Rb1 expression levels on chromosome XpYp. Control bar is the data for the untransfected U2OS cells. Ef1-RB1 bar shows the data for the U2OS transfected with the RB1 over-expressing vector and the shRB1 bar shows the data for the U2OS transfected with the RB1 knock-down vector. Error bars show the SD of 3 technical replicates. Significance of the experiment was assessed with one-way ANOVA.

Supplementary 3: Cloning strategy of the TERRA promoter into a luciferase reporter vector (pGl3) and constructs formed. Cloning was performed using the XhoI site (\*) and Hind III site (\*\*\*) to remove the sv40 promoter and replace it with the TERRA promoter predicted sequence (vTERRA). The vTERRA\* truncated construct lacking the 3' end was randomly obtained during the cloning process.

Supplementary 4: *In vitro* luciferase expression driven by the sv40 promoter (pGl3) is not modulated by RB1 levels in transient co-transfections with either shRB1 or Ef1-RB1. Error bars show the standard deviation of three technical replicates 72 hours after transfection. RLU stands for relative luciferase units (relative to  $\beta$ -Galactosidase).

Supplementary 5: All primers used in this study.

## Supplementary 1

A

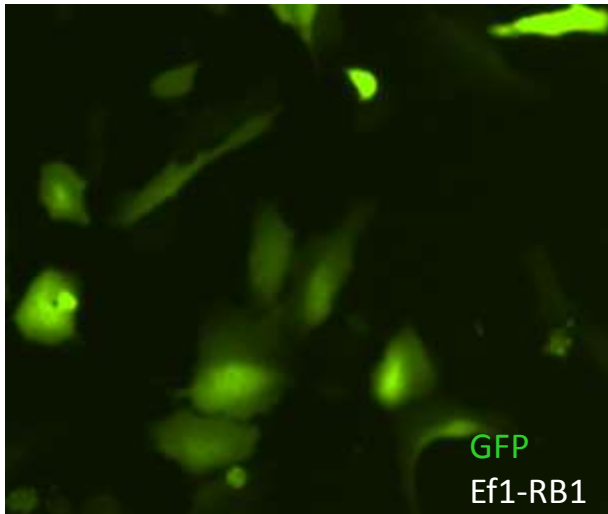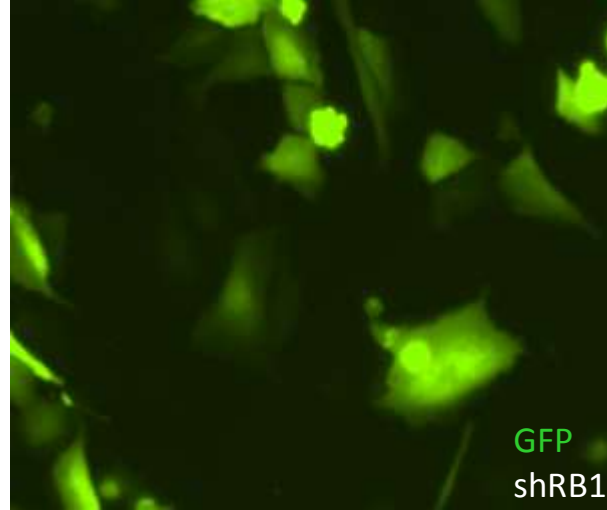

B

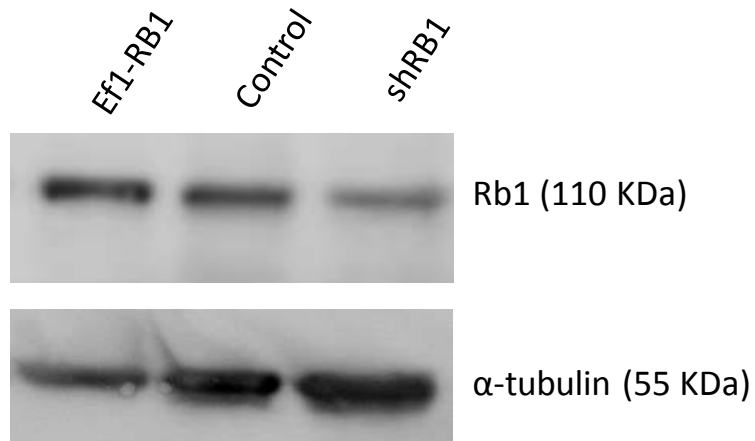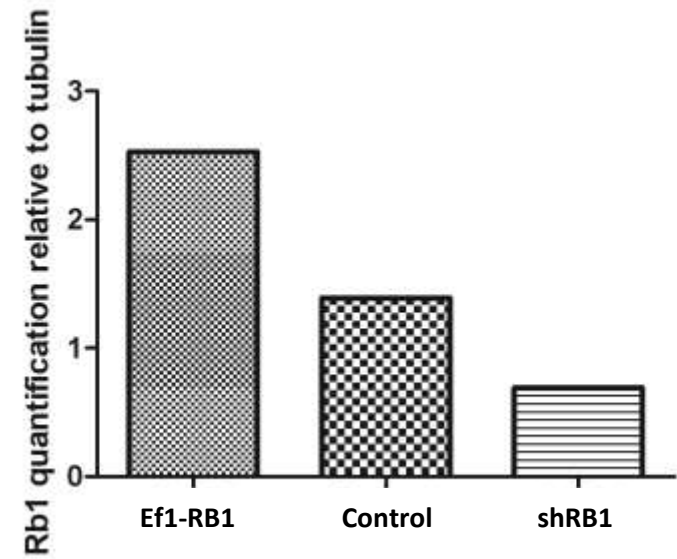

Supplementary 2

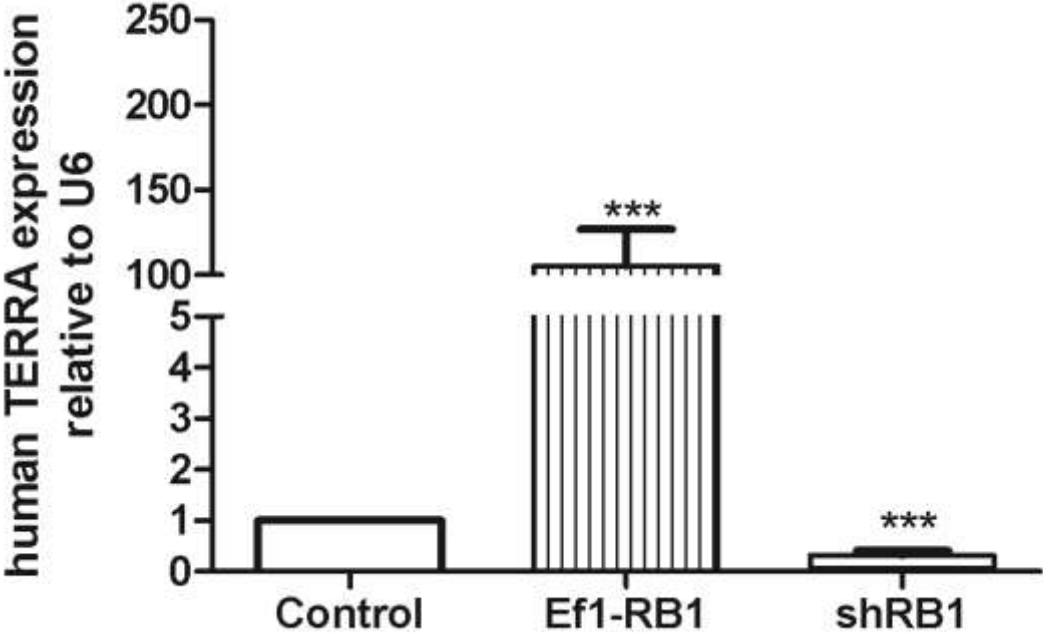

# Supplementary 3

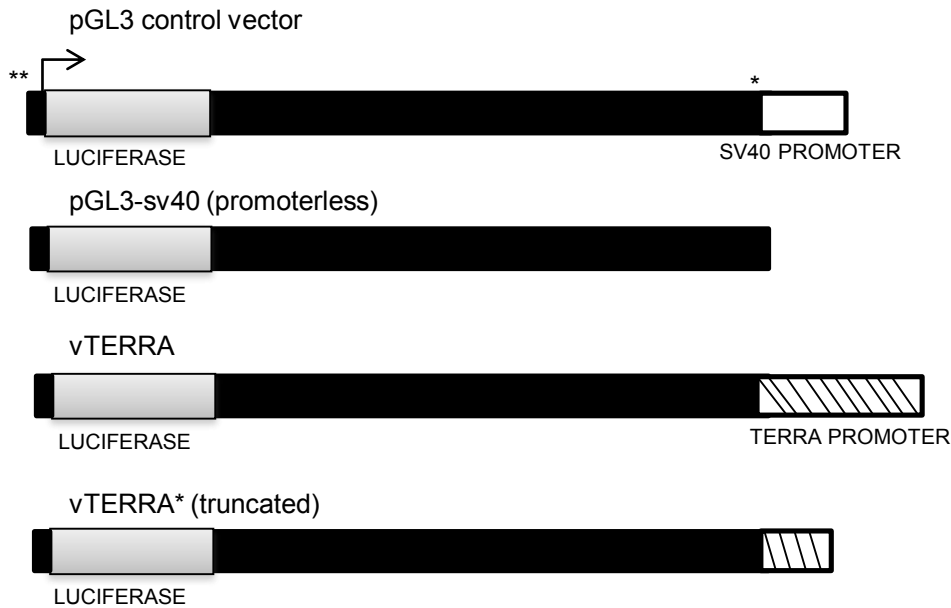

## Supplementary 4

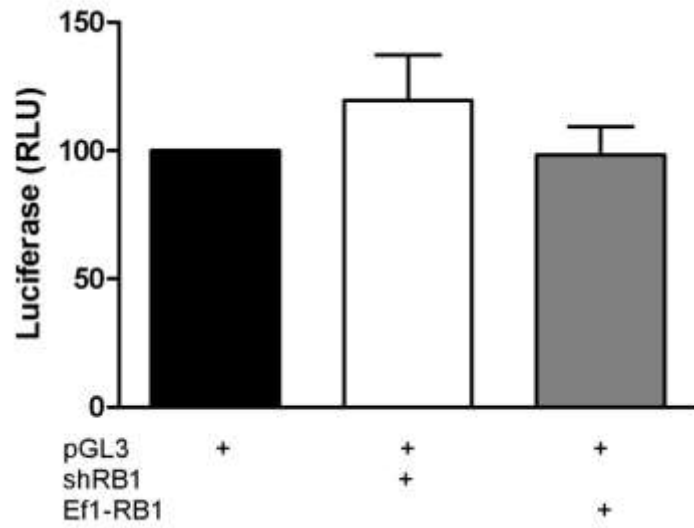

## Supplementary 5

|                   |                                         |
|-------------------|-----------------------------------------|
| Telo fwd          | CGGTTTGGTTGGGTTTGGGTTTGGGTTTGGGTTTGGGT  |
| Telo rev          | GGCTTGCCTTACCCTTACCCTTACCCTTACCCTTACCCT |
| 36B fwd           | CAGCCAGTGGGAAGGTGTAATCC                 |
| 36B rev           | CCCATTCTATCATCAACGGGTACAA               |
| TERRA_ChIP fw     | CTGCAACACACGCCCCC                       |
| TERRA_ChIP rv     | TAGCATGTGTCTCTGCGCCT                    |
| XhoI TERRA fw     | NNNNNCTCGAGCACCGTGACGTGAGTTTCTG         |
| HindIII TERRA rev | NNNNNAAGCTTGGTGACCCCCAGGTCTGT           |
| Ch18Mm fw         | AGTTGCAGCATCGGAACG                      |
| Ch18Mm rv         | CCCTGACCCTAACCCTAACC                    |
| Dmmt1m fw         | GCCTCGTTCTTCCTTCTGG                     |
| Dmmt1m rev        | CAGCCTGGAGCACACCAAAG                    |
| Dmmt3a fw         | CAGCGTCACACAGAAGCATATCC                 |
| Dmmt3a rev        | GGTCCTCACTTTGCTGAACTTG                  |
| ChXpYp fwd        | GCAAAGAGTGAAAGAACGAAGCTT                |
| ChXpYp rev        | CCCTCTGAAAGTGGACCAATCA                  |
| Ch10q fw          | GAATCCTGCGCACCGAGAT                     |
| Ch10q rev         | CTGCACTTGAACCCTGCAATAC                  |
| U6 forward        | GGAATCTAGAACATATACTAAAATTGGAAC          |
| U6 reverse        | GAACTCGAGTTTGCGTGCATCCTTGCGC            |
| Chr 15 Hm fw      | CAGCGAGATTCTCCCAAGCTAAG                 |
| Chr 15 Hm rv      | AACCCTAACCACATGAGCAACG                  |
